# Supplementary material for: Inhibitory G proteins play multiple roles to polarize sensory hair cell morphogenesis
Source: eLife. 2024 Apr 23;12:RP88186. doi: 10.7554/eLife.88186 (PMC11037916; doi:10.7554/eLife.88186)
Supplement: Supplementary file 1. [file elife-88186-supp1.xlsx]

## Sheet: Supp. Table 1 Mouse strains
	Gene or model	Official name	Name in the study	MGI #	Reference	Allele description	Genetic background	Genetic background in the study	% surviving mutants at weaning age
	Gnai1								from het x het (expected 25%)	from hom x het (expected 50%)
		Gnai1tm1Lbi	Gnai1neo		Jiang et al, 2002 PMID: 36092739	neo cassette inserted in exon 3		129S1/SvlmJ: C57BL/6J mix	16.4% (12 of 73 animals)	45.8% (49 of 107 animals)
	Gnai2	Gnai2em1Btar	Gnai2del		this study	CRISPR/Cas9 deletion of exons 2-3-4	C57BL/6J	C57BL/6J	9.9% (15 of 152 animals)	9.6% (5 of 52 animals)
								C57BL/6J: FVB/NJ mix	19.7% (12 of 61 animals)	46.7% (50 of 107 animals)
	Gnai3	Gnai3tm1Lbi	Gnai3neo		Jiang et al, 2002 PMID: 36092739	part of intron 5 and exon 6 replaced with a neo cassette		129S1/SvlmJ: C57BL/6J mix	30% (12 of 40 animals)	42% (63 of 150 animals)
			Gnai3flox		this study	floxed exons 2-3	C57BL/6J	C57BL/6J
	Gnao1								from het x het (expected 25%)	from hom x het (expected 50%)
		Gnao1tm1Lbi	Gnao1neo	2152685	Jiang et al, 1998 PMID: 9501252	neo cassette inserted in exon 6	129S1/SvImJ	129S1/SvImJ	6.7% (3 animals out of 45)
									from Atoh1-Cre; het x het (expected 12.5% cKO)	from Atoh1-Cre; hom x het (expected 25% cKO)
		Gnao1tm1c(EUCOMM)Hmgu	Gnao1flox	from 4456727	KOMP	floxed exon 3 - derived from Gnao1tm1a(EUCOMM)Hmgu via FLP-based removal of LacZneo cassette	C57BL/6N	C57BL/6N	40% (10 Atoh1-Cre; flox hom of 25 animals)	30.7% (4 Atoh1-Cre; flox hom of 13 animals)
	Gnai1; Gnai2								from het; het x het; het (expected 6.25%)	from hom; het x hom; het (expected 25% dKO)
		Gnai1tm1Lbi; Gnai2em1Btar	Gnai1neo; Gnai2del		Jiang et al, 2002 PMID: 36092739; this study			129S1/SvlmJ: C57BL/6J:FVB/NJ mix	5,8% (7 of 121 animals)	6.9% (2 of 29 animals)
	Gnai1; Gnai3								from hom; het x hom; het (expected 25% dKO)	from hom; hom x hom; het (expected 50% dKO)
		Gnai1tm1Lbi; Gnai3tm1Lbi	Gnai1neo; Gnai3neo	5560183	Jiang et al, 2002 PMID: 36092739		129S1/SvImJ	129S1/SvImJ	22.2% (20 of 90 animals)	43.2% (60 of 137 animals)
	Foxg1-Cre; Gnai2; Gnai3								from Foxg1-Cre; het; flox/del x het; hom (expected 6.25%)
			Gnai2del; Gnai3flox		this study			129S1/SvlmJ: C57BL/6J:FVB/NJ mix	0% (0 out of 149 animals)
	ptxA	Gt(ROSA)26Sortm1(ptxA)Cgh	LSL-ptxA:myc	3776029	Regard et al, 2007 PMID: 17992256	loxP-stop-loxP cassette before ptxA:myc	C57BL/6:129SvJ
		Gt(ROSA)26Sorem1(ptxA)Btar	LSL-myc:ptxA	6163665	Tarchini et al, 2016 PMID: 27660326	loxP-stop-loxP cassette before myc:ptxA	C57BL/6J	C57BL/6J
			DIO-ptxA		this study	double inverted lox sites flanking ptxA	C57BL/6J	C57BL/6J
	Atoh1-Cre	Tg(Atoh1-cre)1Bfri	Atoh1-Cre	3775845	Matei et al, 2005 PMID: 16145671	randomly inserted transgene with Atoh1 enhancer	(C57BL/6 x CBA)F1	C57BL/6
	Foxg1-Cre	Foxg1tm1(cre)Skm	Foxg1-Cre	1932522	Hebert et al, 2000 PMID: 10837119	Cre knock-in in the Foxg1 gene	129P2/OlaHsd-Hprtb-m3	129S1/SvlmJ: C57BL/6J mix
